# Supplementary material for: miR-211 facilitates platinum chemosensitivity by blocking the DNA damage response (DDR) in ovarian cancer
Source: PubMed Central journal article supplement (PMC6591289; doi:10.1038/s41419-019-1715-x), 2019-06-24
Supplement: 41419_2019_1715_MOESM2_ESM.pdf [file 41419_2019_1715_MOESM2_ESM.pdf]

## Supplementary data

Supplementary Table 1. The clinical characteristics of ovarian cancer patients

| <b>Characteristics</b>    | <b>Total<br/>(n=30)</b> | <b>Responders<br/>(n=16)</b> | <b>Non-responders<br/>(n=14)</b> | <b>P value</b> |
|---------------------------|-------------------------|------------------------------|----------------------------------|----------------|
| Age (y, mean $\pm$ SD)    | 51.2 $\pm$ 7.04         | 52.5 $\pm$ 7.03              | 48.64 $\pm$ 6.34                 | >0.05          |
| FIGO stage                |                         |                              |                                  | >0.05          |
| I                         | 6 (20%)                 | 5 (16.7%)                    | 1 (3.3%)                         |                |
| III                       | 24 (80%)                | 11 (36.7%)                   | 13 (43.3%)                       |                |
| Differentiation           |                         |                              |                                  | >0.05          |
| moderately                | 26 (86.7%)              | 14 (46.6%)                   | 12 (40%)                         |                |
| poorly                    | 4 (13.3%)               | 2 (6.7%)                     | 2 (6.7%)                         |                |
| Tumor size (diameter, cm) |                         |                              |                                  | >0.05          |
| $\leq$ 1cm                | 2 (6.7%)                | 1 (3.3%)                     | 1 (3.3%)                         |                |
| >1cm                      | 28 (93.3)               | 15 (50%)                     | 13 (43.4%)                       |                |

Supplementary Table 2. Primers used to construct luciferase reporter plasmids, and sequence used in this study

| <b>Genes</b>                                      | <b>Primers (5'-3')</b>                                   |
|---------------------------------------------------|----------------------------------------------------------|
| Positive control                                  | F: <i>cgcgt</i> AGGCGAAGGATGACAAAGGGAA <i>a</i>          |
|                                                   | R: <i>agctt</i> TTCCCTTTGTCATCCTTCGCCT <i>a</i>          |
| CHEK1                                             | F1: <i>cgcgttctctgttgatgaaagggataa</i>                   |
|                                                   | R1: <i>agctt</i> TATCCCTTTCATCCAACAGAAGAA <i>a</i>       |
|                                                   | F2: <i>cgcgtactctgaagattaaagggaa</i> <i>ga</i>           |
|                                                   | R2: <i>agctt</i> CTCCCTTTAATCTTCAGGAAGT <i>a</i>         |
| RAD23B                                            | F: <i>cgcgtgggtgggaggggagaaagggaa</i> <i>ca</i>          |
|                                                   | R: <i>agctt</i> GTTCCCTTTCTCCCCTCCCACCC <i>a</i>         |
| RAD51                                             | F: <i>cgcgtctcagctatgtagcaaaagggaa</i> <i>ta</i>         |
|                                                   | R: <i>agctt</i> ATTCCCTTTGCTACATAGCTGAG <i>a</i>         |
| RINT1                                             | F: <i>cgcgtagtactctgtttgaaagggag</i> <i>ca</i>           |
|                                                   | R: <i>agctt</i> GCTCCCTTTCAAACAAGAGTACT <i>a</i>         |
| TRIAP1                                            | F: <i>cgcgtaactaatgctctgaaagggat</i> <i>ca</i>           |
|                                                   | R: <i>agctt</i> GATCCCTTTTCAGAGCATTAGT <i>a</i>          |
| UPF1                                              | F: <i>cgcgttgcgccctgtgaaagggat</i> <i>ca</i>             |
|                                                   | R: <i>agctt</i> GATCCCTTTCCACAGGGGCGCAA <i>a</i>         |
| RAD52                                             | F: <i>cgcgttggactctgtcacaaagggaa</i> <i>cta</i>          |
|                                                   | R: <i>agctt</i> AGTCCCTTTGTGACAGAGTCCAA <i>a</i>         |
| ALKBH1                                            | F1: <i>cgcgtctgggtggtcttcaaaagggat</i> <i>ga</i>         |
|                                                   | R1: <i>agctt</i> CATCCCTTTGAAGACCACCCAGG <i>a</i>        |
|                                                   | F2: <i>cgcgtactaccatcttctcaaaagggataa</i>                |
|                                                   | R2: <i>agctt</i> TATCCCTTTAGGAAGATGGTAGT <i>a</i>        |
| ATRX                                              | F1: <i>cgcgtaaaaagcagagcaaaaagggaa</i> <i>ca</i>         |
|                                                   | R1: <i>agctt</i> GTTCCCTTTTTGCTCTGCTTTTT <i>a</i>        |
|                                                   | F2: <i>cgcgtcaaaaagaagaaaaaaagggaa</i> <i>aa</i>         |
|                                                   | R2: <i>agctt</i> TTTCCCTTTTTTCTTCTTTTTT <i>Ga</i>        |
|                                                   | F3: <i>cgcgtatactaaattctgtaaaagggaga</i> <i>a</i>        |
| R3: <i>agctt</i> TCTCCCTTTACAGAATTTAGTAT <i>a</i> |                                                          |
| ERCC6L2                                           | F: <i>cgcgtgcagtttgcataaaaagggaa</i> <i>ca</i>           |
|                                                   | R: <i>agctt</i> GTTCCCTTTTTATGCAAAACTGC <i>a</i>         |
| CUL4B                                             | F: <i>cgcgtgttctgttacactgaaagggat</i> <i>ga</i>          |
|                                                   | R: <i>agctt</i> CATCCCTTTCAGTGTAACAGAA <i>C</i> <i>a</i> |
| CCNA2                                             | F: <i>cgcgtggatctctaatgaaaagggat</i> <i>ga</i>           |
|                                                   | R: <i>agctt</i> CATCCCTTTTTTCATTAGAGATCC <i>a</i>        |
| GTF2H3                                            | F: <i>cgcgtacgtagcttggaaaagggaa</i> <i>cta</i>           |
|                                                   | R: <i>agctt</i> AGTCCCTTTTTCCAAAGCTACGT <i>a</i>         |
| HMGB1                                             | F: <i>cgcgtcctgatgcagcaaaaagggaa</i> <i>gta</i>          |
|                                                   | R: <i>agctt</i> ACTCCCTTTTTTGCTGCATCAGG <i>a</i>         |
| INT3                                              | F: <i>cgcgtatctctgacagagcaaaagggaa</i> <i>gta</i>        |

|                         |                                                   |
|-------------------------|---------------------------------------------------|
|                         | R: <i>agctt</i> ACTCCCTTTGCTCTGTCAGGATA <i>a</i>  |
| DDB2                    | F: <i>cgcgta</i> acccaccttcac <i>aaagggatta</i>   |
|                         | R: <i>agctt</i> AATCCCTTTGATGAAGGTGGGTT <i>a</i>  |
| POLH                    | F1: <i>cgcgtcagatttcctgagaaagggata</i>            |
|                         | R1: <i>agctt</i> ATTCCCTTTCTCAGGGAAATCTG <i>a</i> |
|                         | F2: <i>cgcgtaaagttggcacagaaagggacca</i>           |
|                         | R2: <i>agctt</i> GGTCCCTTTTCTGTGCCAACTTT <i>a</i> |
|                         | F3: <i>cgcgttagttaaaaaaaaaaaagggatta</i>          |
|                         | R3: <i>agctt</i> AATCCCTTTTTTTTTTTTAACTA <i>a</i> |
| SSRP1                   | F: <i>cgcgtg</i> aaaatgattta <i>aaagggaa</i> ca   |
|                         | R: <i>agctt</i> GTTCCCTTTATTAAATCATTTT <i>Ca</i>  |
| TDP1                    | F: <i>cgcgtgggacatgctggataaagggaa</i> ca          |
|                         | R: <i>agctt</i> GTTCCCTTTATCCAGCATGTCC <i>Ca</i>  |
| MRPS11                  | F: <i>cgcgtc</i> cagaacattaaa <i>aaagggaaa</i>    |
|                         | R: <i>agctt</i> TTTCCCTTTTTTAATGTTCTGAG <i>a</i>  |
| miR-211-5p mimics       | Sense 5'-UCCCCUUGUCAUCCUUCGCCU-3'                 |
|                         | Antisense 5'-GCGAAGGAUGACAAAGGGAAUU-3'            |
| miR-211 inhibitor       | 5'-AGGCGAAGGAUGACAAAGGGAA-3'                      |
| miR-211 antisense probe | 5'-AGGCGAAGGATGACAAAGGGAA-3'                      |
| ShTDP1                  | AGTTTCAAAGTGAAACAGAAG                             |

Supplementary Table 3. 80 DDR genes that exhibited a response to platinum drugs.

| Gene symbol | DDR pathway | Gene symbol | DDR pathway | Gene symbol | DDR pathway | Gene symbol | DDR pathway |
|-------------|-------------|-------------|-------------|-------------|-------------|-------------|-------------|
| CETN2       | NER         | POLK        | TLS         | ERCC2       | NER         | MDC1        | ATM         |
| DDB2        | NER         | REV3L       | TLS         | RAD52       | FA/HR       | RAD1        | ATM         |
| ERCC8       | NER         | RAD50       | FA/HR       | XPA         | NER         | ERCC6       | NER         |
| RAD17       | ATM         | CHEK2       | ATM         | POLI        | TLS         | BRIP1       | FA/HR       |
| H2AFX       | ATM         | RAD54B      | FA/HR       | TOPBP1      | ATM         | USP1        | FA/HR       |
| HLTF        | TLS         | FBXO18      | TLS         | ATR         | ATM         | FANCE       | FA/HR       |
| ERCC1       | NER         | FANCB       | FA/HR       | UBE2N       | ATM         | RAD51C      | FA/HR       |
| UBE2B       | TLS         | NBN         | FA/HR       | ERCC5       | NER         | SHFM1       | FA/HR       |
| RAD9A       | ATM         | FANCG       | FA/HR       | ATM         | ATM         | FANCD2      | FA/HR       |
| C17orf70    | FA/HR       | CLSPN       | ATM         | RNF8        | ATM         | MAD2L2      | TLS         |
| BRCA2       | FA/HR       | FANCL       | FA/HR       | ERCC3       | NER         | REV1        | TLS         |
| FANCI       | FA/HR       | ATRIP       | ATM         | DDB1        | NER         | SHPRH       | TLS         |
| RBBP8       | FA/HR       | HUS1        | ATM         | FANCC       | FA/HR       | MUS81       | FA/HR       |
| UBE2V2      | TLS         | RAD18       | TLS         | XRCC3       | FA/HR       | MRE11A      | FA/HR       |
| FANCA       | FA/HR       | POLH        | TLS         | RAD23B      | NER         | RAD51       | FA/HR       |
| PALB2       | FA/HR       | CHEK1       | ATM         | RAD23A      | NER         | XRCC2       | FA/HR       |
| TP53BP1     | ATM         | WDR48       | FA/HR       | FANCM       | FA/HR       | UBE2I       | TLS         |
| RAD54L      | FA/HR       | TOP2A       | ATM         | XAB2        | NER         | ERCC4       | NER         |
| BLM         | FA/HR       | BRCA1       | FA/HR       | TP53        | ATM         | RAD51L1     | FA/HR       |
| C19orf40    | FA/HR       | FANCF       | FA/HR       | XPC         | NER         | RAD51L3     | FA/HR       |

Supplementary Table 4. The top 9 miRNAs targeting DDR genes responding to platinum

| <b>miRNA</b> | <b>DDR genes responding to platinum</b>                                                      |
|--------------|----------------------------------------------------------------------------------------------|
| miR-211/204  | RAD51, RAD52, ATM, HLF, RAD23B, WDR48, DDB2, POLH, UBE2B, CHEK1, REV3E, UBE2V2, PALB2, FANCL |
| Let-7        | MDC1, WDR48, RAD23B, RAD9A, ERCC5, RNF8, FANCD2, FANCC, TOPBP1, ERCC6, TP53, UBE2B, TOP2A    |
| miR-421      | SHFM1, RAD50, FANCE, RAD1, RAD54L, XRCC2, REV3E, CHEK1, UBE2B, RAD17, TP53                   |
| miR-301b     | SHFM1, RBBP8, RAD51B, FANCM, NBN, ERCC4, POLK, FANCA, ERCC6, POLH                            |
| miR-146a     | BLM, FANCI, BRCA1, ATR, CHEK1, TOP2A                                                         |
| miR-505      | SHPRH, REV3E, CHEK1, RAD17, SHFM1                                                            |
| miR-324      | UBE2I, RAD17, UBE2B, MDC1                                                                    |
| miR-320      | FANCF, RAD9A, RAD23B, HLF                                                                    |
| miR-193a     | UBE2N, WDR48, MDC1                                                                           |

Supplementary Table 6. 23 target genes are significantly negatively correlated with miR-211.

| Target Gene | Experiments | Functions                                                                                                                                                                         | Ref.(PMID) | P value   |
|-------------|-------------|-----------------------------------------------------------------------------------------------------------------------------------------------------------------------------------|------------|-----------|
| AKAP13      | HITS-CLIP   | Anchors cAMP- dependent protein kinase.                                                                                                                                           | 19536157   | 0.0498477 |
| ARSE        | HITS-CLIP   | The composition of cartilage and bone matrix during development.                                                                                                                  | 23824327   | 0.0461715 |
| BCL7A       | HITS-CLIP   | Not clear.                                                                                                                                                                        | 23824327   | 0.0040596 |
| CACNA1C     | PAR-CLIP    | Muscle contraction/ hormone or neuro- transmitter release/ Gene expression /Cell motility,division, death                                                                         | 22100165   | 0.0333576 |
| CD28        | HITS-CLIP   | T-cell activation/Cell proliferation/Cytokine production/T-cell survival                                                                                                          | 23824327   | 0.0320574 |
| DPF3        | HITS-CLIP   | Self-renewal or proliferative capacity of the multipotent neural stem cells/Dendrite growth/transcriptional activation and repression / development of heart and skeletal muscle. | 23824327   | 0.0298730 |
| ETF1        | HITS-CLIP   | Translational regulation                                                                                                                                                          | 23824327   | 0.0450870 |
| GLP1R       | HITS-CLIP   | A receptor for glucagon-like peptide 1                                                                                                                                            | 23824327   | 0.0382149 |
| HOXC8       | PAR-CLIP    | Transcription factor                                                                                                                                                              | 20371350   | 0.0163929 |
| MESDC1      | HITS-CLIP   | Not clear                                                                                                                                                                         | 23824327   | 0.0005623 |
| MICA        | HITS-CLIP   | Ligand for the KLRK-1/NKG2D receptor                                                                                                                                              | 23824327   | 0.0203057 |
| MUC4        | HITS-CLIP   | Repression of apoptosis/Anti-adhesive properties/ Proliferation                                                                                                                   | 23824327   | 0.0189769 |
| PALM2-AKAP2 | HITS-CLIP   | Not Clear                                                                                                                                                                         | 23824327   | 0.0142971 |
| PDF         | HITS-CLIP   | Removal of the formyl group from the N-terminal Met of newly synthesized proteins                                                                                                 | 23824327   | 0.0434386 |
| PRLR        | HITS-CLIP   | A receptor for the anterior pituitary hormone prolactin/                                                                                                                          | 23824327   | 0.0162198 |

---

|         |                                                              |                                                   |          |             |
|---------|--------------------------------------------------------------|---------------------------------------------------|----------|-------------|
|         |                                                              | Prosurvival factor for spermatozoa                |          |             |
| SLC27A2 | HITS-CLIP                                                    | Bile acid metabolism/Fatty acid metabolism        | 23824327 | 0.0041475   |
| SNAI2   | HITS-CLIP                                                    | Transcriptional repressor                         | 23824327 | 0.0356045   |
| SORCS2  | PAR-CLIP                                                     | Not Clear                                         | 20371350 | 0.0495637   |
| STC2    | HITS-CLIP                                                    | Regulating calcium and phosphate homeostasis      | 23824327 | 0.0016057   |
| SYAP1   | HITS-CLIP                                                    | Not Clear                                         | 23824327 | 0.0426751   |
| SYT6    | HITS-CLIP                                                    | Ca(2+)-dependent exocytosis of secretory vesicles | 23824327 | 0.0119142   |
| TTC38   | HITS-CLIP                                                    | Not Clear                                         | 23824327 | 2.10505e-06 |
| NFAT5   | Luciferase reporter assay, Microarray, qRT-PCR, Western blot | Transcription factor                              | 24039954 | 0.0058981   |

---

Supplementary Table 7. 75 samples with either somatic or germline mutations of BRCA1/2

| <b>Samples</b> | <b>Genetic defect</b>     | <b>Additional information</b> |
|----------------|---------------------------|-------------------------------|
| TCGA-04-1357   | BRCA1 somatic mutation    | Nonsense_Mutation             |
| TCGA-13-0730   | BRCA1 somatic mutation    | Nonsense_Mutation             |
| TCGA-13-0761   | BRCA1 somatic mutation    | Splice_Site                   |
| TCGA-13-0804   | BRCA1 somatic mutation    | Missense_Mutation             |
| TCGA-13-1489   | BRCA1 somatic mutation    | Frame_Shift_Ins               |
| TCGA-24-2035   | BRCA1 somatic mutation    | Frame_Shift_Del               |
| TCGA-25-1625   | BRCA1 somatic mutation    | Nonsense_Mutation             |
| TCGA-29-2427   | BRCA1 somatic mutation    | Nonsense_Mutation             |
| TCGA-04-1331   | BRCA2 somatic mutation    | Nonsense_Mutation             |
| TCGA-09-2050   | BRCA2 somatic mutation    | Nonsense_Mutation             |
| TCGA-13-0792   | BRCA2 somatic mutation    | Missense_Mutation             |
| TCGA-13-0885   | BRCA2 somatic mutation    | Frame_Shift_Del               |
| TCGA-13-0890   | BRCA2 somatic mutation    | Frame_Shift_Del               |
| TCGA-13-1481   | BRCA2 somatic mutation    | Frame_Shift_Del               |
| TCGA-23-1030   | BRCA2 somatic mutation    | Missense_Mutation             |
| TCGA-23-1120   | BRCA2 somatic mutation    | Frame_Shift_Del               |
| TCGA-24-1103   | BRCA2 somatic mutation    | Missense_Mutation             |
| TCGA-24-1555   | BRCA2 somatic mutation    | Frame_Shift_Del               |
| TCGA-29-1693   | BRCA2 somatic mutation    | Frame_Shift_Del               |
| TCGA-29-1762   | BRCA2 somatic mutation    | Nonsense_Mutation             |
| TCGA-61-1903   | BRCA2 somatic mutation    | Missense_Mutation             |
| TCGA-09-2051   | BRCA1/2 germline mutation | Obtained from 21720365        |
| TCGA-10-0931   | BRCA1/2 germline mutation | Obtained from 21720365        |
| TCGA-13-0887   | BRCA1/2 germline mutation | Obtained from 21720365        |
| TCGA-13-0893   | BRCA1/2 germline mutation | Obtained from 21720365        |
| TCGA-23-1122   | BRCA1/2 germline mutation | Obtained from 21720365        |
| TCGA-57-1582   | BRCA1/2 germline mutation | Obtained from 21720365        |
| TCGA-59-2348   | BRCA1/2 germline mutation | Obtained from 21720365        |
| TCGA-24-1470   | BRCA1/2 germline mutation | Obtained from 21720365        |
| TCGA-25-2401   | BRCA1/2 germline mutation | Obtained from 21720365        |
| TCGA-23-1118   | BRCA1/2 germline mutation | Obtained from 21720365        |
| TCGA-09-2045   | BRCA1/2 germline mutation | Obtained from 21720365        |
| TCGA-13-0883   | BRCA1/2 germline mutation | Obtained from 21720365        |
| TCGA-10-0927   | BRCA1/2 germline mutation | Obtained from 21720365        |
| TCGA-25-1318   | BRCA1/2 germline mutation | Obtained from 21720365        |
| TCGA-23-2077   | BRCA1/2 germline mutation | Obtained from 21720365        |
| TCGA-23-2079   | BRCA1/2 germline mutation | Obtained from 21720365        |
| TCGA-13-1512   | BRCA1/2 germline mutation | Obtained from 21720365        |
| TCGA-23-1023   | BRCA1/2 germline mutation | Obtained from 21720365        |
| TCGA-09-1669   | BRCA1/2 germline mutation | Obtained from 21720365        |



---

|              |                           |                        |
|--------------|---------------------------|------------------------|
| TCGA-13-0889 | BRCA1/2 germline mutation | Obtained from 21720365 |
| TCGA-23-2081 | BRCA1/2 germline mutation | Obtained from 21720365 |
| TCGA-04-1356 | BRCA1/2 germline mutation | Obtained from 21720365 |
| TCGA-23-2078 | BRCA1/2 germline mutation | Obtained from 21720365 |
| TCGA-25-2392 | BRCA1/2 germline mutation | Obtained from 21720365 |
| TCGA-13-1408 | BRCA1/2 germline mutation | Obtained from 21720365 |
| TCGA-13-0802 | BRCA1/2 germline mutation | Obtained from 21720365 |
| TCGA-61-2008 | BRCA1/2 germline mutation | Obtained from 21720365 |
| TCGA-13-0903 | BRCA1/2 germline mutation | Obtained from 21720365 |
| TCGA-10-0937 | BRCA1/2 germline mutation | Obtained from 21720365 |
| TCGA-23-1027 | BRCA1/2 germline mutation | Obtained from 21720365 |
| TCGA-24-2298 | BRCA1/2 germline mutation | Obtained from 21720365 |
| TCGA-61-2109 | BRCA1/2 germline mutation | Obtained from 21720365 |
| TCGA-04-1367 | BRCA1/2 germline mutation | Obtained from 21720365 |
| TCGA-13-1498 | BRCA1/2 germline mutation | Obtained from 21720365 |
| TCGA-59-2351 | BRCA1/2 germline mutation | Obtained from 21720365 |
| TCGA-13-0766 | BRCA1/2 germline mutation | Obtained from 21720365 |
| TCGA-24-2288 | BRCA1/2 germline mutation | Obtained from 21720365 |
| TCGA-13-0913 | BRCA1/2 germline mutation | Obtained from 21720365 |
| TCGA-25-1634 | BRCA1/2 germline mutation | Obtained from 21720365 |
| TCGA-04-1336 | BRCA1/2 germline mutation | Obtained from 21720365 |
| TCGA-24-2293 | BRCA1/2 germline mutation | Obtained from 21720365 |
| TCGA-13-0886 | BRCA1/2 germline mutation | Obtained from 21720365 |
| TCGA-24-1562 | BRCA1/2 germline mutation | Obtained from 21720365 |
| TCGA-24-1463 | BRCA1/2 germline mutation | Obtained from 21720365 |
| TCGA-13-1499 | BRCA1/2 germline mutation | Obtained from 21720365 |
| TCGA-13-0793 | BRCA1/2 germline mutation | Obtained from 21720365 |
| TCGA-24-2280 | BRCA1/2 germline mutation | Obtained from 21720365 |
| TCGA-25-1318 | BRCA1/2 germline mutation | Obtained from 21720365 |
| TCGA-57-1584 | BRCA1/2 germline mutation | Obtained from 21720365 |
| TCGA-13-1512 | BRCA1/2 germline mutation | Obtained from 21720365 |
| TCGA-13-0726 | BRCA1/2 germline mutation | Obtained from 21720365 |
| TCGA-24-0975 | BRCA1/2 germline mutation | Obtained from 21720365 |
| TCGA-24-1417 | BRCA1/2 germline mutation | Obtained from 21720365 |
| TCGA-24-1555 | BRCA1/2 germline mutation | Obtained from 21720365 |
| TCGA-24-2024 | BRCA1/2 germline mutation | Obtained from 21720365 |
| TCGA-23-1026 | BRCA1/2 germline mutation | Obtained from 21720365 |
| TCGA-25-2404 | BRCA1/2 germline mutation | Obtained from 21720365 |

---

Supplementary Table 8. 20 targets of miR-211 were associated with DNA damage response

| <b>Gene name</b> | <b>Pathways</b>                              | <b>Potential binding sites within target mRNAs</b> |
|------------------|----------------------------------------------|----------------------------------------------------|
| CHEK1            | ATM                                          | 1316-1322 (ORF); 2272-2279 (ORF)                   |
| RAD23B           | NER                                          | 2200-2207(3'UTR)                                   |
| RAD51            | HR                                           | 1732-1739(3'UTR)                                   |
| RAD52            | HR                                           | 1431-1437(3'UTR)                                   |
| RINT1            | DNA damage checkpoint                        | 1457-1463(ORF)                                     |
| TRIAP1           | DNA damage response                          | 711-717(3'UTR)                                     |
| UPF1             | DNA binding and genome stability maintenance | 1431-1437(ORF);4855-4860(3'UTR)                    |
| ALKBH1           | Repair of alkylation damaged DNA             | 788-794(ORF);2306-2312(3'UTR)                      |
| TRX              | DNA damage response                          | 3237-3243/6065-6072 (ORF)<br>10558-10564(3'UTR)    |
| ERCC6L2          | DNA repair                                   | 925-932(ORF)                                       |
| CUL4B            | DNA repair                                   | 3566-3572(3'UTR)                                   |
| CCNA2            | DNA damage checkpoint                        | 2690-2696(3'UTR)                                   |
| GTF2H3           | DNA repair                                   | 1429-1435(3'UTR)                                   |
| HMGB1            | DNA binding and repair                       | 679-685(ORF);2420-2425(3'UTR)                      |
| INT3             | DNA damage response                          | 1125-1131(ORF)                                     |
| TDP1             | BER                                          | 777-784(ORF)                                       |
| DDB2             | NER                                          | 646-652(ORF)                                       |
| POLH             | TLS                                          | 2537-2544/3486-3492/3547-3553(3'UTR)               |
| SSRP1            | HR                                           | 2796-2803(3'UTR)                                   |
| MRPS11           | DNA damage response                          | 56-78 (5'UTR)                                      |
