# Supplementary material for: miR-211 facilitates platinum chemosensitivity by blocking the DNA damage response (DDR) in ovarian cancer
Source: PubMed Central journal article supplement (PMC6591289; doi:10.1038/s41419-019-1715-x), 2019-06-24
Supplement: 41419_2019_1715_MOESM3_ESM.pdf [file 41419_2019_1715_MOESM3_ESM.pdf]

Supplementary Table 5. The 321 targets of miR-211 identified according to miRTarBase

| miRTarBase ID | miRNA          | Species (miRNA) | Target Gene |
|---------------|----------------|-----------------|-------------|
| MIRT636431    | hsa-miR-211-5p | Homo sapiens    | 1-Mar       |
| MIRT618848    | hsa-miR-211-5p | Homo sapiens    | A1CF        |
| MIRT643804    | hsa-miR-211-5p | Homo sapiens    | ABCC12      |
| MIRT624863    | hsa-miR-211-5p | Homo sapiens    | ABHD15      |
| MIRT539417    | hsa-miR-211-5p | Homo sapiens    | ADAT2       |
| MIRT720868    | hsa-miR-211-5p | Homo sapiens    | ADCY5       |
| MIRT660887    | hsa-miR-211-5p | Homo sapiens    | ADCYAP1R1   |
| MIRT717451    | hsa-miR-211-5p | Homo sapiens    | ADORA3      |
| MIRT660848    | hsa-miR-211-5p | Homo sapiens    | AFF4        |
| MIRT648240    | hsa-miR-211-5p | Homo sapiens    | AGAP1       |
| MIRT683218    | hsa-miR-211-5p | Homo sapiens    | AGO2        |
| MIRT669584    | hsa-miR-211-5p | Homo sapiens    | AK2         |
| MIRT662352    | hsa-miR-211-5p | Homo sapiens    | AKAP13      |
| MIRT662352    | hsa-miR-211-5p | Homo sapiens    | AKAP13      |
| MIRT660777    | hsa-miR-211-5p | Homo sapiens    | AKAP2       |
| MIRT632076    | hsa-miR-211-5p | Homo sapiens    | ALDH1A2     |
| MIRT660770    | hsa-miR-211-5p | Homo sapiens    | ALDH6A1     |
| MIRT660700    | hsa-miR-211-5p | Homo sapiens    | AMOTL2      |
| MIRT624758    | hsa-miR-211-5p | Homo sapiens    | ANGPTL2     |
| MIRT660683    | hsa-miR-211-5p | Homo sapiens    | ANKFY1      |
| MIRT647179    | hsa-miR-211-5p | Homo sapiens    | ANKRD45     |
| MIRT054445    | hsa-miR-211-5p | Homo sapiens    | AP1S2       |
| MIRT054445    | hsa-miR-211-5p | Homo sapiens    | AP1S2       |
| MIRT617471    | hsa-miR-211-5p | Homo sapiens    | AP5B1       |
| MIRT624684    | hsa-miR-211-5p | Homo sapiens    | ARAP2       |
| MIRT638968    | hsa-miR-211-5p | Homo sapiens    | ARHGAP6     |
| MIRT185715    | hsa-miR-211-5p | Homo sapiens    | ARNTL2      |
| MIRT615211    | hsa-miR-211-5p | Homo sapiens    | ARSE        |
| MIRT631538    | hsa-miR-211-5p | Homo sapiens    | AS3MT       |
| MIRT724362    | hsa-miR-211-5p | Homo sapiens    | ASGR1       |
| MIRT713974    | hsa-miR-211-5p | Homo sapiens    | ASIC4       |
| MIRT645432    | hsa-miR-211-5p | Homo sapiens    | ATF6B       |
| MIRT613805    | hsa-miR-211-5p | Homo sapiens    | ATP6AP1L    |
| MIRT167969    | hsa-miR-211-5p | Homo sapiens    | ATXN1       |
| MIRT641312    | hsa-miR-211-5p | Homo sapiens    | ATXN7       |
| MIRT641469    | hsa-miR-211-5p | Homo sapiens    | B4GALNT3    |
| MIRT660361    | hsa-miR-211-5p | Homo sapiens    | BACH2       |
| MIRT650426    | hsa-miR-211-5p | Homo sapiens    | BBS9        |
| MIRT489334    | hsa-miR-211-5p | Homo sapiens    | BCAN        |
| MIRT489334    | hsa-miR-211-5p | Homo sapiens    | BCAN        |
| MIRT489334    | hsa-miR-211-5p | Homo sapiens    | BCAN        |
| MIRT438781    | hsa-miR-211-5p | Homo sapiens    | BCL2        |
| MIRT615113    | hsa-miR-211-5p | Homo sapiens    | BCL7A       |
| MIRT626402    | hsa-miR-211-5p | Homo sapiens    | BID         |
| MIRT660284    | hsa-miR-211-5p | Homo sapiens    | BLOC1S5     |
| MIRT660229    | hsa-miR-211-5p | Homo sapiens    | BMPR1A      |
| MIRT613279    | hsa-miR-211-5p | Homo sapiens    | BRD4        |
| MIRT660081    | hsa-miR-211-5p | Homo sapiens    | BZW1        |

|            |                |              |          |
|------------|----------------|--------------|----------|
| MIRT707108 | hsa-miR-211-5p | Homo sapiens | C11orf74 |
| MIRT660060 | hsa-miR-211-5p | Homo sapiens | C12orf5  |
| MIRT649274 | hsa-miR-211-5p | Homo sapiens | C17orf64 |
| MIRT619999 | hsa-miR-211-5p | Homo sapiens | C1orf64  |
| MIRT617362 | hsa-miR-211-5p | Homo sapiens | C21orf62 |
| MIRT644147 | hsa-miR-211-5p | Homo sapiens | C4orf3   |
| MIRT646888 | hsa-miR-211-5p | Homo sapiens | C6orf132 |
| MIRT659933 | hsa-miR-211-5p | Homo sapiens | CACHD1   |
| MIRT444933 | hsa-miR-211-5p | Homo sapiens | CACNA1C  |
| MIRT624479 | hsa-miR-211-5p | Homo sapiens | CACNG8   |
| MIRT659901 | hsa-miR-211-5p | Homo sapiens | CAMK2G   |
| MIRT659861 | hsa-miR-211-5p | Homo sapiens | CAPRIN1  |
| MIRT526584 | hsa-miR-211-5p | Homo sapiens | CCDC43   |
| MIRT659710 | hsa-miR-211-5p | Homo sapiens | CCDC93   |
| MIRT641337 | hsa-miR-211-5p | Homo sapiens | CCR5     |
| MIRT662215 | hsa-miR-211-5p | Homo sapiens | CCRL2    |
| MIRT659683 | hsa-miR-211-5p | Homo sapiens | CD28     |
| MIRT719257 | hsa-miR-211-5p | Homo sapiens | CD44     |
| MIRT095329 | hsa-miR-211-5p | Homo sapiens | CDC23    |
| MIRT619800 | hsa-miR-211-5p | Homo sapiens | CDC42EP4 |
| MIRT624381 | hsa-miR-211-5p | Homo sapiens | CDH4     |
| MIRT006257 | hsa-miR-211-5p | Homo sapiens | CDH5     |
| MIRT609199 | hsa-miR-211-5p | Homo sapiens | CDH8     |
| MIRT614151 | hsa-miR-211-5p | Homo sapiens | CEP97    |
| MIRT614151 | hsa-miR-211-5p | Homo sapiens | CEP97    |
| MIRT642780 | hsa-miR-211-5p | Homo sapiens | CHCHD3   |
| MIRT618150 | hsa-miR-211-5p | Homo sapiens | CHCHD5   |
| MIRT642147 | hsa-miR-211-5p | Homo sapiens | CHORDC1  |
| MIRT640839 | hsa-miR-211-5p | Homo sapiens | CHRDL1   |
| MIRT621382 | hsa-miR-211-5p | Homo sapiens | CLNK     |
| MIRT615190 | hsa-miR-211-5p | Homo sapiens | CLUAP1   |
| MIRT646347 | hsa-miR-211-5p | Homo sapiens | CPT1B    |
| MIRT006462 | hsa-miR-211-5p | Homo sapiens | CREB5    |
| MIRT636590 | hsa-miR-211-5p | Homo sapiens | DCAF7    |
| MIRT054455 | hsa-miR-211-5p | Homo sapiens | DDIT3    |
| MIRT659098 | hsa-miR-211-5p | Homo sapiens | DENR     |
| MIRT715237 | hsa-miR-211-5p | Homo sapiens | DHODH    |
| MIRT658968 | hsa-miR-211-5p | Homo sapiens | DNAJB5   |
| MIRT658968 | hsa-miR-211-5p | Homo sapiens | DNAJB5   |
| MIRT624096 | hsa-miR-211-5p | Homo sapiens | DNAJC16  |
| MIRT618424 | hsa-miR-211-5p | Homo sapiens | DNAJC30  |
| MIRT615254 | hsa-miR-211-5p | Homo sapiens | DPF2     |
| MIRT617323 | hsa-miR-211-5p | Homo sapiens | DPF3     |
| MIRT646198 | hsa-miR-211-5p | Homo sapiens | DUSP10   |
| MIRT504460 | hsa-miR-211-5p | Homo sapiens | EID2B    |
| MIRT280118 | hsa-miR-211-5p | Homo sapiens | ELMSAN1  |
| MIRT006463 | hsa-miR-211-5p | Homo sapiens | ELOVL6   |
| MIRT646524 | hsa-miR-211-5p | Homo sapiens | ELP2     |
| MIRT646524 | hsa-miR-211-5p | Homo sapiens | ELP2     |
| MIRT658622 | hsa-miR-211-5p | Homo sapiens | ENAH     |

|            |                |              |           |
|------------|----------------|--------------|-----------|
| MIRT638755 | hsa-miR-211-5p | Homo sapiens | EPHA4     |
| MIRT628244 | hsa-miR-211-5p | Homo sapiens | ETF1      |
| MIRT703848 | hsa-miR-211-5p | Homo sapiens | ETV3      |
| MIRT658438 | hsa-miR-211-5p | Homo sapiens | FAM167B   |
| MIRT658333 | hsa-miR-211-5p | Homo sapiens | FAM83F    |
| MIRT658263 | hsa-miR-211-5p | Homo sapiens | FAXC      |
| MIRT647957 | hsa-miR-211-5p | Homo sapiens | FBXO31    |
| MIRT611807 | hsa-miR-211-5p | Homo sapiens | FCRL4     |
| MIRT616716 | hsa-miR-211-5p | Homo sapiens | FEM1B     |
| MIRT658120 | hsa-miR-211-5p | Homo sapiens | FNBP1L    |
| MIRT099067 | hsa-miR-211-5p | Homo sapiens | FOXC1     |
| MIRT615984 | hsa-miR-211-5p | Homo sapiens | FSTL4     |
| MIRT668238 | hsa-miR-211-5p | Homo sapiens | FZD8      |
| MIRT658023 | hsa-miR-211-5p | Homo sapiens | G3BP2     |
| MIRT623852 | hsa-miR-211-5p | Homo sapiens | GALNT1    |
| MIRT620589 | hsa-miR-211-5p | Homo sapiens | GALNT10   |
| MIRT623837 | hsa-miR-211-5p | Homo sapiens | GAN       |
| MIRT640772 | hsa-miR-211-5p | Homo sapiens | GLP1R     |
| MIRT648254 | hsa-miR-211-5p | Homo sapiens | GP2       |
| MIRT639760 | hsa-miR-211-5p | Homo sapiens | GPR45     |
| MIRT623733 | hsa-miR-211-5p | Homo sapiens | GTDC1     |
| MIRT649525 | hsa-miR-211-5p | Homo sapiens | GTF3C3    |
| MIRT716093 | hsa-miR-211-5p | Homo sapiens | HARS      |
| MIRT657487 | hsa-miR-211-5p | Homo sapiens | HCAR2     |
| MIRT668000 | hsa-miR-211-5p | Homo sapiens | HCFC2     |
| MIRT646404 | hsa-miR-211-5p | Homo sapiens | HLA-DRB1  |
| MIRT618805 | hsa-miR-211-5p | Homo sapiens | HLA-DRB5  |
| MIRT718175 | hsa-miR-211-5p | Homo sapiens | HLCS      |
| MIRT438707 | hsa-miR-211-5p | Homo sapiens | HMX1      |
| MIRT657357 | hsa-miR-211-5p | Homo sapiens | HNRNPA2B1 |
| MIRT248293 | hsa-miR-211-5p | Homo sapiens | HOXC8     |
| MIRT248293 | hsa-miR-211-5p | Homo sapiens | HOXC8     |
| MIRT623660 | hsa-miR-211-5p | Homo sapiens | HRK       |
| MIRT647671 | hsa-miR-211-5p | Homo sapiens | HTR1F     |
| MIRT054454 | hsa-miR-211-5p | Homo sapiens | IGF2R     |
| MIRT054449 | hsa-miR-211-5p | Homo sapiens | IGFBP5    |
| MIRT054449 | hsa-miR-211-5p | Homo sapiens | IGFBP5    |
| MIRT536708 | hsa-miR-211-5p | Homo sapiens | IKZF2     |
| MIRT536708 | hsa-miR-211-5p | Homo sapiens | IKZF2     |
| MIRT007023 | hsa-miR-211-5p | Homo sapiens | IL11      |
| MIRT007023 | hsa-miR-211-5p | Homo sapiens | IL11      |
| MIRT487493 | hsa-miR-211-5p | Homo sapiens | IL1F10    |
| MIRT487493 | hsa-miR-211-5p | Homo sapiens | IL1F10    |
| MIRT645827 | hsa-miR-211-5p | Homo sapiens | INADL     |
| MIRT644057 | hsa-miR-211-5p | Homo sapiens | IQCE      |
| MIRT567132 | hsa-miR-211-5p | Homo sapiens | IRF2BP2   |
| MIRT162736 | hsa-miR-211-5p | Homo sapiens | ITPR1     |
| MIRT725294 | hsa-miR-211-5p | Homo sapiens | KANSL1    |
| MIRT005943 | hsa-miR-211-5p | Homo sapiens | KCNMA1    |
| MIRT623489 | hsa-miR-211-5p | Homo sapiens | KCTD11    |

|            |                |              |           |
|------------|----------------|--------------|-----------|
| MIRT642906 | hsa-miR-211-5p | Homo sapiens | KIAA0754  |
| MIRT641626 | hsa-miR-211-5p | Homo sapiens | KIAA1244  |
| MIRT656956 | hsa-miR-211-5p | Homo sapiens | KIAA1324L |
| MIRT656928 | hsa-miR-211-5p | Homo sapiens | KIAA1462  |
| MIRT648773 | hsa-miR-211-5p | Homo sapiens | KLHL40    |
| MIRT656794 | hsa-miR-211-5p | Homo sapiens | KNTC1     |
| MIRT616906 | hsa-miR-211-5p | Homo sapiens | LINC00598 |
| MIRT448697 | hsa-miR-211-5p | Homo sapiens | LIPC      |
| MIRT719818 | hsa-miR-211-5p | Homo sapiens | LRRC4     |
| MIRT656611 | hsa-miR-211-5p | Homo sapiens | LRRC55    |
| MIRT526373 | hsa-miR-211-5p | Homo sapiens | LSAMP     |
| MIRT722272 | hsa-miR-211-5p | Homo sapiens | LURAP1    |
| MIRT708671 | hsa-miR-211-5p | Homo sapiens | LY6G6D    |
| MIRT709770 | hsa-miR-211-5p | Homo sapiens | LY6G6F    |
| MIRT054448 | hsa-miR-211-5p | Homo sapiens | M6PR      |
| MIRT198273 | hsa-miR-211-5p | Homo sapiens | MAFG      |
| MIRT645022 | hsa-miR-211-5p | Homo sapiens | MAGEB4    |
| MIRT438782 | hsa-miR-211-5p | Homo sapiens | MAP2K1    |
| MIRT683213 | hsa-miR-211-5p | Homo sapiens | MBNL1     |
| MIRT656409 | hsa-miR-211-5p | Homo sapiens | MCTP1     |
| MIRT656362 | hsa-miR-211-5p | Homo sapiens | MDFI      |
| MIRT656362 | hsa-miR-211-5p | Homo sapiens | MDFI      |
| MIRT713623 | hsa-miR-211-5p | Homo sapiens | MED8      |
| MIRT656308 | hsa-miR-211-5p | Homo sapiens | MESDC1    |
| MIRT656250 | hsa-miR-211-5p | Homo sapiens | MEX3A     |
| MIRT635071 | hsa-miR-211-5p | Homo sapiens | MICA      |
| MIRT556122 | hsa-miR-211-5p | Homo sapiens | MIER3     |
| MIRT619602 | hsa-miR-211-5p | Homo sapiens | MKKS      |
| MIRT053791 | hsa-miR-211-5p | Homo sapiens | MMP9      |
| MIRT722164 | hsa-miR-211-5p | Homo sapiens | MRPS15    |
| MIRT649769 | hsa-miR-211-5p | Homo sapiens | MRPS27    |
| MIRT649769 | hsa-miR-211-5p | Homo sapiens | MRPS27    |
| MIRT513815 | hsa-miR-211-5p | Homo sapiens | MTA3      |
| MIRT646744 | hsa-miR-211-5p | Homo sapiens | MUC4      |
| MIRT656047 | hsa-miR-211-5p | Homo sapiens | MYLK4     |
| MIRT667319 | hsa-miR-211-5p | Homo sapiens | MYO18A    |
| MIRT643658 | hsa-miR-211-5p | Homo sapiens | MYOCD     |
| MIRT655991 | hsa-miR-211-5p | Homo sapiens | MYRF      |
| MIRT054453 | hsa-miR-211-5p | Homo sapiens | NFAT5     |
| MIRT639063 | hsa-miR-211-5p | Homo sapiens | NFATC1    |
| MIRT655848 | hsa-miR-211-5p | Homo sapiens | NGDN      |
| MIRT655822 | hsa-miR-211-5p | Homo sapiens | NOTCH1    |
| MIRT664819 | hsa-miR-211-5p | Homo sapiens | NOX5      |
| MIRT655763 | hsa-miR-211-5p | Homo sapiens | NPTX1     |
| MIRT438079 | hsa-miR-211-5p | Homo sapiens | NUAK1     |
| MIRT623049 | hsa-miR-211-5p | Homo sapiens | NUDT3     |
| MIRT712684 | hsa-miR-211-5p | Homo sapiens | NUDT7     |
| MIRT715043 | hsa-miR-211-5p | Homo sapiens | NUPL2     |
| MIRT620042 | hsa-miR-211-5p | Homo sapiens | ODF4      |
| MIRT655619 | hsa-miR-211-5p | Homo sapiens | ONECUT3   |

|                   |                       |                     |                |
|-------------------|-----------------------|---------------------|----------------|
| MIRT504152        | hsa-miR-211-5p        | Homo sapiens        | OPN5           |
| <b>MIRT504152</b> | <b>hsa-miR-211-5p</b> | <b>Homo sapiens</b> | <b>OPN5</b>    |
| MIRT655542        | hsa-miR-211-5p        | Homo sapiens        | PADI2          |
| <b>MIRT655542</b> | <b>hsa-miR-211-5p</b> | <b>Homo sapiens</b> | <b>PADI2</b>   |
| MIRT655432        | hsa-miR-211-5p        | Homo sapiens        | PALM2-AKAP2    |
| MIRT625842        | hsa-miR-211-5p        | Homo sapiens        | PAQR7          |
| MIRT054450        | hsa-miR-211-5p        | Homo sapiens        | PDE3A          |
| MIRT622864        | hsa-miR-211-5p        | Homo sapiens        | PDF            |
| MIRT343781        | hsa-miR-211-5p        | Homo sapiens        | PHF13          |
| MIRT643292        | hsa-miR-211-5p        | Homo sapiens        | PHKG1          |
| MIRT655094        | hsa-miR-211-5p        | Homo sapiens        | PI4K2A         |
| MIRT630664        | hsa-miR-211-5p        | Homo sapiens        | PLAG1          |
| MIRT654993        | hsa-miR-211-5p        | Homo sapiens        | PLCG1          |
| MIRT483170        | hsa-miR-211-5p        | Homo sapiens        | PLCXD3         |
| <b>MIRT483170</b> | <b>hsa-miR-211-5p</b> | <b>Homo sapiens</b> | <b>PLCXD3</b>  |
| MIRT638421        | hsa-miR-211-5p        | Homo sapiens        | PNRC1          |
| MIRT650771        | hsa-miR-211-5p        | Homo sapiens        | POP4           |
| MIRT640921        | hsa-miR-211-5p        | Homo sapiens        | POU2F1         |
| MIRT521792        | hsa-miR-211-5p        | Homo sapiens        | POU2F2         |
| MIRT006355        | hsa-miR-211-5p        | Homo sapiens        | POU3F2         |
| MIRT654832        | hsa-miR-211-5p        | Homo sapiens        | PPP1CC         |
| MIRT654820        | hsa-miR-211-5p        | Homo sapiens        | PPP3R1         |
| MIRT626948        | hsa-miR-211-5p        | Homo sapiens        | PRDM2          |
| MIRT627372        | hsa-miR-211-5p        | Homo sapiens        | PRICKLE4       |
| MIRT666805        | hsa-miR-211-5p        | Homo sapiens        | PRLR           |
| MIRT646248        | hsa-miR-211-5p        | Homo sapiens        | PRSS38         |
| MIRT654603        | hsa-miR-211-5p        | Homo sapiens        | PTPRT          |
| MIRT546868        | hsa-miR-211-5p        | Homo sapiens        | RAB10          |
| <b>MIRT546868</b> | <b>hsa-miR-211-5p</b> | <b>Homo sapiens</b> | <b>RAB10</b>   |
| MIRT654558        | hsa-miR-211-5p        | Homo sapiens        | RAB11FIP4      |
| MIRT654556        | hsa-miR-211-5p        | Homo sapiens        | RAB14          |
| MIRT006465        | hsa-miR-211-5p        | Homo sapiens        | RAB22A         |
| <b>MIRT006465</b> | <b>hsa-miR-211-5p</b> | <b>Homo sapiens</b> | <b>RAB22A</b>  |
| MIRT654513        | hsa-miR-211-5p        | Homo sapiens        | RAB5B          |
| MIRT469640        | hsa-miR-211-5p        | Homo sapiens        | RACGAP1        |
| <b>MIRT469640</b> | <b>hsa-miR-211-5p</b> | <b>Homo sapiens</b> | <b>RACGAP1</b> |
| <b>MIRT469640</b> | <b>hsa-miR-211-5p</b> | <b>Homo sapiens</b> | <b>RACGAP1</b> |
| <b>MIRT469640</b> | <b>hsa-miR-211-5p</b> | <b>Homo sapiens</b> | <b>RACGAP1</b> |
| MIRT654340        | hsa-miR-211-5p        | Homo sapiens        | RBM27          |
| MIRT716155        | hsa-miR-211-5p        | Homo sapiens        | RBM48          |
| MIRT621143        | hsa-miR-211-5p        | Homo sapiens        | RNF122         |
| MIRT654177        | hsa-miR-211-5p        | Homo sapiens        | RNMTL1         |
| MIRT654162        | hsa-miR-211-5p        | Homo sapiens        | RORB           |
| MIRT618667        | hsa-miR-211-5p        | Homo sapiens        | RPP40          |
| MIRT054803        | hsa-miR-211-5p        | Homo sapiens        | RRM2           |
| MIRT642876        | hsa-miR-211-5p        | Homo sapiens        | SAMD1          |
| MIRT622355        | hsa-miR-211-5p        | Homo sapiens        | SAMD5          |
| MIRT722370        | hsa-miR-211-5p        | Homo sapiens        | SEC31B         |
| MIRT650841        | hsa-miR-211-5p        | Homo sapiens        | SEMA4G         |
| MIRT054446        | hsa-miR-211-5p        | Homo sapiens        | SERINC3        |

|                   |                       |                     |               |
|-------------------|-----------------------|---------------------|---------------|
| MIRT653913        | hsa-miR-211-5p        | Homo sapiens        | SERPINC1      |
| MIRT662468        | hsa-miR-211-5p        | Homo sapiens        | SERPINF2      |
| MIRT512990        | hsa-miR-211-5p        | Homo sapiens        | SEZ6L         |
| <b>MIRT512990</b> | <b>hsa-miR-211-5p</b> | <b>Homo sapiens</b> | <b>SEZ6L</b>  |
| MIRT627605        | hsa-miR-211-5p        | Homo sapiens        | SFT2D2        |
| MIRT057025        | hsa-miR-211-5p        | Homo sapiens        | SGPL1         |
| MIRT666430        | hsa-miR-211-5p        | Homo sapiens        | SH2B3         |
| MIRT649397        | hsa-miR-211-5p        | Homo sapiens        | SH2D4A        |
| MIRT646285        | hsa-miR-211-5p        | Homo sapiens        | SH3BP5L       |
| MIRT612505        | hsa-miR-211-5p        | Homo sapiens        | SH3PXD2A      |
| MIRT639168        | hsa-miR-211-5p        | Homo sapiens        | SHOX2         |
| MIRT617164        | hsa-miR-211-5p        | Homo sapiens        | SLC16A5       |
| MIRT107789        | hsa-miR-211-5p        | Homo sapiens        | SLC1A1        |
| MIRT646388        | hsa-miR-211-5p        | Homo sapiens        | SLC22A6       |
| MIRT649354        | hsa-miR-211-5p        | Homo sapiens        | SLC27A2       |
| MIRT653553        | hsa-miR-211-5p        | Homo sapiens        | SLC38A7       |
| MIRT622218        | hsa-miR-211-5p        | Homo sapiens        | SLC39A11      |
| MIRT666216        | hsa-miR-211-5p        | Homo sapiens        | SLC39A9       |
| MIRT725151        | hsa-miR-211-5p        | Homo sapiens        | SLC43A1       |
| MIRT653495        | hsa-miR-211-5p        | Homo sapiens        | SLC43A2       |
| MIRT627556        | hsa-miR-211-5p        | Homo sapiens        | SMAD6         |
| MIRT653325        | hsa-miR-211-5p        | Homo sapiens        | SMOC1         |
| MIRT636215        | hsa-miR-211-5p        | Homo sapiens        | SNAI2         |
| MIRT644653        | hsa-miR-211-5p        | Homo sapiens        | SNX9          |
| MIRT451888        | hsa-miR-211-5p        | Homo sapiens        | SOD2          |
| <b>MIRT451888</b> | <b>hsa-miR-211-5p</b> | <b>Homo sapiens</b> | <b>SOD2</b>   |
| MIRT486360        | hsa-miR-211-5p        | Homo sapiens        | SORCS2        |
| <b>MIRT486360</b> | <b>hsa-miR-211-5p</b> | <b>Homo sapiens</b> | <b>SORCS2</b> |
| MIRT653232        | hsa-miR-211-5p        | Homo sapiens        | SOS2          |
| MIRT084444        | hsa-miR-211-5p        | Homo sapiens        | SOWAHC        |
| MIRT612417        | hsa-miR-211-5p        | Homo sapiens        | SP1           |
| MIRT617068        | hsa-miR-211-5p        | Homo sapiens        | SPIB          |
| MIRT645356        | hsa-miR-211-5p        | Homo sapiens        | SPNS1         |
| MIRT644582        | hsa-miR-211-5p        | Homo sapiens        | SPOP          |
| MIRT658826        | hsa-miR-211-5p        | Homo sapiens        | SRCAP         |
| MIRT653147        | hsa-miR-211-5p        | Homo sapiens        | SRGAP1        |
| MIRT054451        | hsa-miR-211-5p        | Homo sapiens        | SSRP1         |
| MIRT641504        | hsa-miR-211-5p        | Homo sapiens        | STC2          |
| MIRT644961        | hsa-miR-211-5p        | Homo sapiens        | STEAP4        |
| MIRT666034        | hsa-miR-211-5p        | Homo sapiens        | STRBP         |
| MIRT652952        | hsa-miR-211-5p        | Homo sapiens        | SYAP1         |
| MIRT652932        | hsa-miR-211-5p        | Homo sapiens        | SYNGR1        |
| MIRT666017        | hsa-miR-211-5p        | Homo sapiens        | SYNJ2BP       |
| MIRT617030        | hsa-miR-211-5p        | Homo sapiens        | SYT6          |
| MIRT532252        | hsa-miR-211-5p        | Homo sapiens        | TBPL2         |
| MIRT006464        | hsa-miR-211-5p        | Homo sapiens        | TCF12         |
| MIRT641842        | hsa-miR-211-5p        | Homo sapiens        | TCF7L2        |
| MIRT663296        | hsa-miR-211-5p        | Homo sapiens        | TECPR2        |
| MIRT053337        | hsa-miR-211-5p        | Homo sapiens        | TGFB1         |
| MIRT054452        | hsa-miR-211-5p        | Homo sapiens        | TGFB2         |

|            |                |              |          |
|------------|----------------|--------------|----------|
| MIRT652683 | hsa-miR-211-5p | Homo sapiens | TIAF1    |
| MIRT497080 | hsa-miR-211-5p | Homo sapiens | TLK2     |
| MIRT648219 | hsa-miR-211-5p | Homo sapiens | TM4SF20  |
| MIRT497311 | hsa-miR-211-5p | Homo sapiens | TMEFF2   |
| MIRT618589 | hsa-miR-211-5p | Homo sapiens | TMEM156  |
| MIRT652445 | hsa-miR-211-5p | Homo sapiens | TMEM236  |
| MIRT639559 | hsa-miR-211-5p | Homo sapiens | TMTC2    |
| MIRT642183 | hsa-miR-211-5p | Homo sapiens | TOR1AIP1 |
| MIRT520547 | hsa-miR-211-5p | Homo sapiens | TPPP     |
| MIRT520547 | hsa-miR-211-5p | Homo sapiens | TPPP     |
| MIRT520547 | hsa-miR-211-5p | Homo sapiens | TPPP     |
| MIRT446103 | hsa-miR-211-5p | Homo sapiens | TSC22D2  |
| MIRT613766 | hsa-miR-211-5p | Homo sapiens | TTC38    |
| MIRT652064 | hsa-miR-211-5p | Homo sapiens | TTC39B   |
| MIRT130079 | hsa-miR-211-5p | Homo sapiens | TXNIP    |
| MIRT651976 | hsa-miR-211-5p | Homo sapiens | UBE2J1   |
| MIRT651902 | hsa-miR-211-5p | Homo sapiens | UFD1L    |
| MIRT661630 | hsa-miR-211-5p | Homo sapiens | UGT2B28  |
| MIRT650855 | hsa-miR-211-5p | Homo sapiens | UNC13D   |
| MIRT650914 | hsa-miR-211-5p | Homo sapiens | VASH1    |
| MIRT651767 | hsa-miR-211-5p | Homo sapiens | VASP     |
| MIRT570336 | hsa-miR-211-5p | Homo sapiens | VAV3     |
| MIRT570336 | hsa-miR-211-5p | Homo sapiens | VAV3     |
| MIRT570336 | hsa-miR-211-5p | Homo sapiens | VAV3     |
| MIRT620222 | hsa-miR-211-5p | Homo sapiens | VN1R1    |
| MIRT646764 | hsa-miR-211-5p | Homo sapiens | WDR3     |
| MIRT651554 | hsa-miR-211-5p | Homo sapiens | WISP1    |
| MIRT644041 | hsa-miR-211-5p | Homo sapiens | WWC2     |
| MIRT651481 | hsa-miR-211-5p | Homo sapiens | WWC3     |
| MIRT569806 | hsa-miR-211-5p | Homo sapiens | XKR4     |
| MIRT642949 | hsa-miR-211-5p | Homo sapiens | XRRA1    |
| MIRT639840 | hsa-miR-211-5p | Homo sapiens | ZBTB20   |
| MIRT609831 | hsa-miR-211-5p | Homo sapiens | ZBTB22   |
| MIRT720970 | hsa-miR-211-5p | Homo sapiens | ZBTB43   |
| MIRT715628 | hsa-miR-211-5p | Homo sapiens | ZBTB8B   |
| MIRT725063 | hsa-miR-211-5p | Homo sapiens | ZCCHC24  |
| MIRT489588 | hsa-miR-211-5p | Homo sapiens | ZDHHC20  |
| MIRT489588 | hsa-miR-211-5p | Homo sapiens | ZDHHC20  |
| MIRT489588 | hsa-miR-211-5p | Homo sapiens | ZDHHC20  |
| MIRT489588 | hsa-miR-211-5p | Homo sapiens | ZDHHC20  |
| MIRT533009 | hsa-miR-211-5p | Homo sapiens | ZFHX3    |
| MIRT632191 | hsa-miR-211-5p | Homo sapiens | ZKSCAN4  |
| MIRT648387 | hsa-miR-211-5p | Homo sapiens | ZNF22    |
| MIRT651161 | hsa-miR-211-5p | Homo sapiens | ZNF362   |
| MIRT714745 | hsa-miR-211-5p | Homo sapiens | ZNF385D  |
| MIRT651131 | hsa-miR-211-5p | Homo sapiens | ZNF398   |
| MIRT651124 | hsa-miR-211-5p | Homo sapiens | ZNF48    |

|            |                |              |         |
|------------|----------------|--------------|---------|
| MIRT497627 | hsa-miR-211-5p | Homo sapiens | ZNF576  |
| MIRT661656 | hsa-miR-211-5p | Homo sapiens | ZNF623  |
| MIRT648805 | hsa-miR-211-5p | Homo sapiens | ZNF689  |
| MIRT646449 | hsa-miR-211-5p | Homo sapiens | ZNF705A |
| MIRT644463 | hsa-miR-211-5p | Homo sapiens | ZNF747  |
| MIRT619978 | hsa-miR-211-5p | Homo sapiens | ZSCAN22 |
| MIRT611458 | hsa-miR-211-5p | Homo sapiens | ZWILCH  |
| MIRT531115 | hsa-miR-211-5p | Homo sapiens | ZYG11B  |

Notes: There are 36 repeat targets, thus the total valid



| Target Gene | (Entrez Species | (Target)            | Experiments           | Support Type | Reference |
|-------------|-----------------|---------------------|-----------------------|--------------|-----------|
| 55016       | Homo sapiens    | HITS-CLIP           | Functional MTI (Weak) | 23824327     |           |
| 29974       | Homo sapiens    | HITS-CLIP           | Functional MTI (Weak) | 23824327     |           |
| 94160       | Homo sapiens    | HITS-CLIP           | Functional MTI (Weak) | 23824327     |           |
| 116236      | Homo sapiens    | HITS-CLIP           | Functional MTI (Weak) | 23824327     |           |
| 134637      | Homo sapiens    | PAR-CLIP            | Functional MTI (Weak) | 22012620     |           |
| 111         | Homo sapiens    | HITS-CLIP           | Functional MTI (Weak) | 19536157     |           |
| 117         | Homo sapiens    | HITS-CLIP           | Functional MTI (Weak) | 23824327     |           |
| 140         | Homo sapiens    | HITS-CLIP           | Functional MTI (Weak) | 19536157     |           |
| 27125       | Homo sapiens    | HITS-CLIP           | Functional MTI (Weak) | 23824327     |           |
| 116987      | Homo sapiens    | HITS-CLIP           | Functional MTI (Weak) | 23824327     |           |
| 27161       | Homo sapiens    | HITS-CLIP           | Functional MTI (Weak) | 23706177     |           |
| 204         | Homo sapiens    | HITS-CLIP           | Functional MTI (Weak) | 23824327     |           |
| 11214       | Homo sapiens    | HITS-CLIP           | Functional MTI (Weak) | 19536157     |           |
| 11214       | Homo sapiens    | HITS-CLIP           | Functional MTI (Weak) | 23824327     |           |
| 11217       | Homo sapiens    | HITS-CLIP           | Functional MTI (Weak) | 23824327     |           |
| 8854        | Homo sapiens    | HITS-CLIP           | Functional MTI (Weak) | 23824327     |           |
| 4329        | Homo sapiens    | HITS-CLIP           | Functional MTI (Weak) | 23824327     |           |
| 51421       | Homo sapiens    | HITS-CLIP           | Functional MTI (Weak) | 23824327     |           |
| 23452       | Homo sapiens    | HITS-CLIP           | Functional MTI (Weak) | 23824327     |           |
| 51479       | Homo sapiens    | HITS-CLIP           | Functional MTI (Weak) | 23824327     |           |
| 339416      | Homo sapiens    | HITS-CLIP           | Functional MTI (Weak) | 23824327     |           |
| 8905        | Homo sapiens    | Luciferase reporter | Functional MTI        | 24039954     |           |
| 8905        | Homo sapiens    | HITS-CLIP           | Functional MTI (Weak) | 23824327     |           |
| 91056       | Homo sapiens    | HITS-CLIP           | Functional MTI (Weak) | 23824327     |           |
| 116984      | Homo sapiens    | HITS-CLIP           | Functional MTI (Weak) | 23824327     |           |
| 395         | Homo sapiens    | HITS-CLIP           | Functional MTI (Weak) | 23824327     |           |
| 56938       | Homo sapiens    | PAR-CLIP            | Functional MTI (Weak) | 20371350     |           |
| 415         | Homo sapiens    | HITS-CLIP           | Functional MTI (Weak) | 23824327     |           |
| 57412       | Homo sapiens    | HITS-CLIP           | Functional MTI (Weak) | 23824327     |           |
| 432         | Homo sapiens    | HITS-CLIP           | Functional MTI (Weak) | 19536157     |           |
| 55515       | Homo sapiens    | HITS-CLIP           | Functional MTI (Weak) | 19536157     |           |
| 1388        | Homo sapiens    | HITS-CLIP           | Functional MTI (Weak) | 23824327     |           |
| 92270       | Homo sapiens    | HITS-CLIP           | Functional MTI (Weak) | 23824327     |           |
| 6310        | Homo sapiens    | HITS-CLIP           | Functional MTI (Weak) | 23824327     |           |
| 6314        | Homo sapiens    | HITS-CLIP           | Functional MTI (Weak) | 23824327     |           |
| 283358      | Homo sapiens    | HITS-CLIP           | Functional MTI (Weak) | 23824327     |           |
| 60468       | Homo sapiens    | HITS-CLIP           | Functional MTI (Weak) | 23824327     |           |
| 27241       | Homo sapiens    | HITS-CLIP           | Functional MTI (Weak) | 23824327     |           |
| 63827       | Homo sapiens    | PAR-CLIP            | Functional MTI (Weak) | 20371350     |           |
| 63827       | Homo sapiens    | PAR-CLIP            | Functional MTI (Weak) | 21572407     |           |
| 63827       | Homo sapiens    | PAR-CLIP            | Functional MTI (Weak) | 22012620     |           |
| 63827       | Homo sapiens    | PAR-CLIP            | Functional MTI (Weak) | 23592263     |           |
| 596         | Homo sapiens    | qRT-PCR//Western    | Functional MTI        | 24960059     |           |
| 605         | Homo sapiens    | HITS-CLIP           | Functional MTI (Weak) | 23824327     |           |
| 637         | Homo sapiens    | HITS-CLIP           | Functional MTI (Weak) | 23824327     |           |
| 63915       | Homo sapiens    | HITS-CLIP           | Functional MTI (Weak) | 23824327     |           |
| 657         | Homo sapiens    | HITS-CLIP           | Functional MTI (Weak) | 23824327     |           |
| 23476       | Homo sapiens    | HITS-CLIP           | Functional MTI (Weak) | 23824327     |           |
| 9689        | Homo sapiens    | HITS-CLIP           | Functional MTI (Weak) | 23824327     |           |

|        |              |                  |                       |          |
|--------|--------------|------------------|-----------------------|----------|
| 119710 | Homo sapiens | HITS-CLIP        | Functional MTI (Weak) | 21572407 |
| 57103  | Homo sapiens | HITS-CLIP        | Functional MTI (Weak) | 23824327 |
| 124773 | Homo sapiens | HITS-CLIP        | Functional MTI (Weak) | 23824327 |
| 149563 | Homo sapiens | HITS-CLIP        | Functional MTI (Weak) | 23824327 |
| 56245  | Homo sapiens | HITS-CLIP        | Functional MTI (Weak) | 23824327 |
| 401152 | Homo sapiens | HITS-CLIP        | Functional MTI (Weak) | 23824327 |
| 647024 | Homo sapiens | HITS-CLIP        | Functional MTI (Weak) | 23824327 |
| 57685  | Homo sapiens | HITS-CLIP        | Functional MTI (Weak) | 23824327 |
| 775    | Homo sapiens | PAR-CLIP         | Functional MTI (Weak) | 22100165 |
| 59283  | Homo sapiens | HITS-CLIP        | Functional MTI (Weak) | 23824327 |
| 818    | Homo sapiens | HITS-CLIP        | Functional MTI (Weak) | 23824327 |
| 4076   | Homo sapiens | HITS-CLIP        | Functional MTI (Weak) | 23824327 |
| 124808 | Homo sapiens | PAR-CLIP         | Functional MTI (Weak) | 22012620 |
| 54520  | Homo sapiens | HITS-CLIP        | Functional MTI (Weak) | 23824327 |
| 1234   | Homo sapiens | HITS-CLIP        | Functional MTI (Weak) | 23824327 |
| 9034   | Homo sapiens | HITS-CLIP        | Functional MTI (Weak) | 23824327 |
| 940    | Homo sapiens | HITS-CLIP        | Functional MTI (Weak) | 23824327 |
| 960    | Homo sapiens | HITS-CLIP        | Functional MTI (Weak) | 19536157 |
| 8697   | Homo sapiens | PAR-CLIP         | Functional MTI (Weak) | 21572407 |
| 23580  | Homo sapiens | HITS-CLIP        | Functional MTI (Weak) | 23824327 |
| 1002   | Homo sapiens | HITS-CLIP        | Functional MTI (Weak) | 23824327 |
| 1003   | Homo sapiens | Luciferase repor | Functional MTI        | 22235338 |
| 1006   | Homo sapiens | HITS-CLIP        | Functional MTI (Weak) | 23824327 |
| 79598  | Homo sapiens | HITS-CLIP        | Functional MTI (Weak) | 23313552 |
| 79598  | Homo sapiens | HITS-CLIP        | Functional MTI (Weak) | 23824327 |
| 54927  | Homo sapiens | HITS-CLIP        | Functional MTI (Weak) | 23824327 |
| 84269  | Homo sapiens | HITS-CLIP        | Functional MTI (Weak) | 23824327 |
| 26973  | Homo sapiens | HITS-CLIP        | Functional MTI (Weak) | 23824327 |
| 91851  | Homo sapiens | HITS-CLIP        | Functional MTI (Weak) | 23824327 |
| 116449 | Homo sapiens | HITS-CLIP        | Functional MTI (Weak) | 23824327 |
| 23059  | Homo sapiens | HITS-CLIP        | Functional MTI (Weak) | 23824327 |
| 1375   | Homo sapiens | HITS-CLIP        | Functional MTI (Weak) | 23824327 |
| 9586   | Homo sapiens | Immunofluorescer | Functional MTI        | 22523078 |
| 10238  | Homo sapiens | HITS-CLIP        | Functional MTI (Weak) | 23824327 |
| 1649   | Homo sapiens | Luciferase repor | Functional MTI        | 24039954 |
| 8562   | Homo sapiens | HITS-CLIP        | Functional MTI (Weak) | 23824327 |
| 1723   | Homo sapiens | HITS-CLIP        | Functional MTI (Weak) | 19536157 |
| 25822  | Homo sapiens | HITS-CLIP        | Functional MTI (Weak) | 19536157 |
| 25822  | Homo sapiens | HITS-CLIP        | Functional MTI (Weak) | 23824327 |
| 23341  | Homo sapiens | HITS-CLIP        | Functional MTI (Weak) | 23824327 |
| 84277  | Homo sapiens | HITS-CLIP        | Functional MTI (Weak) | 23824327 |
| 5977   | Homo sapiens | HITS-CLIP        | Functional MTI (Weak) | 23824327 |
| 8110   | Homo sapiens | HITS-CLIP        | Functional MTI (Weak) | 23824327 |
| 11221  | Homo sapiens | HITS-CLIP        | Functional MTI (Weak) | 23824327 |
| 126272 | Homo sapiens | PAR-CLIP         | Functional MTI (Weak) | 23446348 |
| 91748  | Homo sapiens | HITS-CLIP        | Functional MTI (Weak) | 23313552 |
| 79071  | Homo sapiens | Immunofluorescer | Functional MTI        | 22523078 |
| 55250  | Homo sapiens | HITS-CLIP        | Functional MTI (Weak) | 19536157 |
| 55250  | Homo sapiens | HITS-CLIP        | Functional MTI (Weak) | 23824327 |
| 55740  | Homo sapiens | HITS-CLIP        | Functional MTI (Weak) | 23824327 |

|        |              |                  |                       |          |
|--------|--------------|------------------|-----------------------|----------|
| 2043   | Homo sapiens | HITS-CLIP        | Functional MTI (Weak) | 23824327 |
| 2107   | Homo sapiens | HITS-CLIP        | Functional MTI (Weak) | 23824327 |
| 2117   | Homo sapiens | HITS-CLIP        | Functional MTI (Weak) | 23313552 |
| 84734  | Homo sapiens | HITS-CLIP        | Functional MTI (Weak) | 23824327 |
| 113828 | Homo sapiens | HITS-CLIP        | Functional MTI (Weak) | 23824327 |
| 84553  | Homo sapiens | HITS-CLIP        | Functional MTI (Weak) | 23824327 |
| 79791  | Homo sapiens | HITS-CLIP        | Functional MTI (Weak) | 23824327 |
| 83417  | Homo sapiens | HITS-CLIP        | Functional MTI (Weak) | 23824327 |
| 10116  | Homo sapiens | HITS-CLIP        | Functional MTI (Weak) | 23824327 |
| 54874  | Homo sapiens | HITS-CLIP        | Functional MTI (Weak) | 23824327 |
| 2296   | Homo sapiens | PAR-CLIP         | Functional MTI (Weak) | 20371350 |
| 23105  | Homo sapiens | HITS-CLIP        | Functional MTI (Weak) | 23824327 |
| 8325   | Homo sapiens | HITS-CLIP        | Functional MTI (Weak) | 23824327 |
| 9908   | Homo sapiens | HITS-CLIP        | Functional MTI (Weak) | 23824327 |
| 2589   | Homo sapiens | HITS-CLIP        | Functional MTI (Weak) | 23824327 |
| 55568  | Homo sapiens | HITS-CLIP        | Functional MTI (Weak) | 23824327 |
| 8139   | Homo sapiens | HITS-CLIP        | Functional MTI (Weak) | 23824327 |
| 2740   | Homo sapiens | HITS-CLIP        | Functional MTI (Weak) | 23824327 |
| 2813   | Homo sapiens | HITS-CLIP        | Functional MTI (Weak) | 23824327 |
| 11250  | Homo sapiens | HITS-CLIP        | Functional MTI (Weak) | 23824327 |
| 79712  | Homo sapiens | HITS-CLIP        | Functional MTI (Weak) | 23824327 |
| 9330   | Homo sapiens | HITS-CLIP        | Functional MTI (Weak) | 23824327 |
| 3035   | Homo sapiens | HITS-CLIP        | Functional MTI (Weak) | 19536157 |
| 338442 | Homo sapiens | HITS-CLIP        | Functional MTI (Weak) | 23824327 |
| 29915  | Homo sapiens | HITS-CLIP        | Functional MTI (Weak) | 23824327 |
| 3123   | Homo sapiens | HITS-CLIP        | Functional MTI (Weak) | 23824327 |
| 3127   | Homo sapiens | HITS-CLIP        | Functional MTI (Weak) | 23824327 |
| 3141   | Homo sapiens | HITS-CLIP        | Functional MTI (Weak) | 19536157 |
| 3166   | Homo sapiens | Immunocytochemis | Functional MTI        | 24641951 |
| 3181   | Homo sapiens | HITS-CLIP        | Functional MTI (Weak) | 23824327 |
| 3224   | Homo sapiens | PAR-CLIP         | Functional MTI (Weak) | 20371350 |
| 3224   | Homo sapiens | PAR-CLIP         | Functional MTI (Weak) | 21572407 |
| 8739   | Homo sapiens | HITS-CLIP        | Functional MTI (Weak) | 23824327 |
| 3355   | Homo sapiens | HITS-CLIP        | Functional MTI (Weak) | 23824327 |
| 3482   | Homo sapiens | Luciferase repor | Functional MTI        | 24039954 |
| 3488   | Homo sapiens | Luciferase repor | Functional MTI        | 24039954 |
| 3488   | Homo sapiens | PAR-CLIP         | Functional MTI (Weak) | 20371350 |
| 22807  | Homo sapiens | PAR-CLIP         | Functional MTI (Weak) | 22012620 |
| 22807  | Homo sapiens | HITS-CLIP        | Functional MTI (Weak) | 23824327 |
| 3589   | Homo sapiens | Luciferase repor | Functional MTI        | 22629385 |
| 3589   | Homo sapiens | Luciferase repor | Functional MTI        | 24039954 |
| 84639  | Homo sapiens | PAR-CLIP         | Functional MTI (Weak) | 20371350 |
| 84639  | Homo sapiens | PAR-CLIP         | Functional MTI (Weak) | 23592263 |
| 10207  | Homo sapiens | HITS-CLIP        | Functional MTI (Weak) | 23824327 |
| 23288  | Homo sapiens | HITS-CLIP        | Functional MTI (Weak) | 23824327 |
| 359948 | Homo sapiens | PAR-CLIP         | Functional MTI (Weak) | 20371350 |
| 3708   | Homo sapiens | qRT-PCR//Westerr | Functional MTI        | 24960059 |
| 284058 | Homo sapiens | HITS-CLIP        | Functional MTI (Weak) | 19536157 |
| 3778   | Homo sapiens | Microarray//LacZ | Functional MTI        | 21072171 |
| 147040 | Homo sapiens | HITS-CLIP        | Functional MTI (Weak) | 23824327 |

|           |              |                  |                       |          |
|-----------|--------------|------------------|-----------------------|----------|
| 643314    | Homo sapiens | HITS-CLIP        | Functional MTI (Weak) | 23824327 |
| 57221     | Homo sapiens | HITS-CLIP        | Functional MTI (Weak) | 23824327 |
| 222223    | Homo sapiens | HITS-CLIP        | Functional MTI (Weak) | 23824327 |
| 57608     | Homo sapiens | HITS-CLIP        | Functional MTI (Weak) | 23824327 |
| 131377    | Homo sapiens | HITS-CLIP        | Functional MTI (Weak) | 23824327 |
| 9735      | Homo sapiens | HITS-CLIP        | Functional MTI (Weak) | 23824327 |
| 646982    | Homo sapiens | HITS-CLIP        | Functional MTI (Weak) | 23824327 |
| 3990      | Homo sapiens | PAR-CLIP         | Functional MTI (Weak) | 22100165 |
| 64101     | Homo sapiens | HITS-CLIP        | Functional MTI (Weak) | 19536157 |
| 219527    | Homo sapiens | HITS-CLIP        | Functional MTI (Weak) | 23824327 |
| 4045      | Homo sapiens | PAR-CLIP         | Functional MTI (Weak) | 22012620 |
| 541468    | Homo sapiens | HITS-CLIP        | Functional MTI (Weak) | 19536157 |
| 58530     | Homo sapiens | HITS-CLIP        | Functional MTI (Weak) | 19536157 |
| 259215    | Homo sapiens | HITS-CLIP        | Functional MTI (Weak) | 19536157 |
| 4074      | Homo sapiens | Luciferase repor | Functional MTI        | 24039954 |
| 4097      | Homo sapiens | HITS-CLIP        | Functional MTI (Weak) | 23824327 |
| 4115      | Homo sapiens | HITS-CLIP        | Functional MTI (Weak) | 23824327 |
| 5604      | Homo sapiens | qRT-PCR//Westerr | Functional MTI        | 24960059 |
| 4154      | Homo sapiens | HITS-CLIP        | Functional MTI (Weak) | 23706177 |
| 79772     | Homo sapiens | HITS-CLIP        | Functional MTI (Weak) | 23824327 |
| 4188      | Homo sapiens | HITS-CLIP        | Functional MTI (Weak) | 19536157 |
| 4188      | Homo sapiens | HITS-CLIP        | Functional MTI (Weak) | 23824327 |
| 112950    | Homo sapiens | HITS-CLIP        | Functional MTI (Weak) | 19536157 |
| 59274     | Homo sapiens | HITS-CLIP        | Functional MTI (Weak) | 23824327 |
| 92312     | Homo sapiens | HITS-CLIP        | Functional MTI (Weak) | 23824327 |
| 100507436 | Homo sapiens | HITS-CLIP        | Functional MTI (Weak) | 23824327 |
| 166968    | Homo sapiens | PAR-CLIP         | Functional MTI (Weak) | 21572407 |
| 8195      | Homo sapiens | HITS-CLIP        | Functional MTI (Weak) | 23824327 |
| 4318      | Homo sapiens | Immunoblot//Immu | Functional MTI (Weak) | 23183822 |
| 64960     | Homo sapiens | HITS-CLIP        | Functional MTI (Weak) | 19536157 |
| 23107     | Homo sapiens | HITS-CLIP        | Functional MTI (Weak) | 19536157 |
| 23107     | Homo sapiens | HITS-CLIP        | Functional MTI (Weak) | 23824327 |
| 57504     | Homo sapiens | PAR-CLIP         | Functional MTI (Weak) | 23446348 |
| 4585      | Homo sapiens | HITS-CLIP        | Functional MTI (Weak) | 23824327 |
| 340156    | Homo sapiens | HITS-CLIP        | Functional MTI (Weak) | 23824327 |
| 399687    | Homo sapiens | HITS-CLIP        | Functional MTI (Weak) | 23824327 |
| 93649     | Homo sapiens | HITS-CLIP        | Functional MTI (Weak) | 23824327 |
| 745       | Homo sapiens | HITS-CLIP        | Functional MTI (Weak) | 23824327 |
| 10725     | Homo sapiens | Luciferase repor | Functional MTI        | 24039954 |
| 4772      | Homo sapiens | HITS-CLIP        | Functional MTI (Weak) | 23824327 |
| 25983     | Homo sapiens | HITS-CLIP        | Functional MTI (Weak) | 23824327 |
| 4851      | Homo sapiens | HITS-CLIP        | Functional MTI (Weak) | 23824327 |
| 79400     | Homo sapiens | HITS-CLIP        | Functional MTI (Weak) | 23824327 |
| 4884      | Homo sapiens | HITS-CLIP        | Functional MTI (Weak) | 23824327 |
| 9891      | Homo sapiens | Luciferase repor | Functional MTI        | 23934065 |
| 11165     | Homo sapiens | HITS-CLIP        | Functional MTI (Weak) | 23824327 |
| 283927    | Homo sapiens | HITS-CLIP        | Functional MTI (Weak) | 19536157 |
| 11097     | Homo sapiens | HITS-CLIP        | Functional MTI (Weak) | 19536157 |
| 146852    | Homo sapiens | HITS-CLIP        | Functional MTI (Weak) | 23824327 |
| 390874    | Homo sapiens | HITS-CLIP        | Functional MTI (Weak) | 23824327 |

|               |                     |                         |                              |                 |
|---------------|---------------------|-------------------------|------------------------------|-----------------|
| 221391        | Homo sapiens        | PAR-CLIP                | Functional MTI (Weak)        | 22012620        |
| <b>221391</b> | <b>Homo sapiens</b> | <b>PAR-CLIP</b>         | <b>Functional MTI (Weak)</b> | <b>23446348</b> |
| 11240         | Homo sapiens        | HITS-CLIP               | Functional MTI (Weak)        | 19536157        |
| <b>11240</b>  | <b>Homo sapiens</b> | <b>HITS-CLIP</b>        | <b>Functional MTI (Weak)</b> | <b>23824327</b> |
| 445815        | Homo sapiens        | HITS-CLIP               | Functional MTI (Weak)        | 23824327        |
| 164091        | Homo sapiens        | HITS-CLIP               | Functional MTI (Weak)        | 23824327        |
| 5139          | Homo sapiens        | Luciferase repor        | Functional MTI               | 24039954        |
| 64146         | Homo sapiens        | HITS-CLIP               | Functional MTI (Weak)        | 23824327        |
| 148479        | Homo sapiens        | PAR-CLIP                | Functional MTI (Weak)        | 20371350        |
| 5260          | Homo sapiens        | HITS-CLIP               | Functional MTI (Weak)        | 23824327        |
| 55361         | Homo sapiens        | HITS-CLIP               | Functional MTI (Weak)        | 23824327        |
| 5324          | Homo sapiens        | HITS-CLIP               | Functional MTI (Weak)        | 23824327        |
| 5335          | Homo sapiens        | HITS-CLIP               | Functional MTI (Weak)        | 23824327        |
| 345557        | Homo sapiens        | PAR-CLIP                | Functional MTI (Weak)        | 22012620        |
| <b>345557</b> | <b>Homo sapiens</b> | <b>PAR-CLIP</b>         | <b>Functional MTI (Weak)</b> | <b>23592263</b> |
| 10957         | Homo sapiens        | HITS-CLIP               | Functional MTI (Weak)        | 23824327        |
| 10775         | Homo sapiens        | HITS-CLIP               | Functional MTI (Weak)        | 23824327        |
| 5451          | Homo sapiens        | HITS-CLIP               | Functional MTI (Weak)        | 23824327        |
| 5452          | Homo sapiens        | PAR-CLIP                | Functional MTI (Weak)        | 23446348        |
| 5454          | Homo sapiens        | Luciferase repor        | Functional MTI               | 21435193        |
| 5501          | Homo sapiens        | HITS-CLIP               | Functional MTI (Weak)        | 23824327        |
| 5534          | Homo sapiens        | HITS-CLIP               | Functional MTI (Weak)        | 23824327        |
| 7799          | Homo sapiens        | HITS-CLIP               | Functional MTI (Weak)        | 23824327        |
| 29964         | Homo sapiens        | HITS-CLIP               | Functional MTI (Weak)        | 23824327        |
| 5618          | Homo sapiens        | HITS-CLIP               | Functional MTI (Weak)        | 23824327        |
| 339501        | Homo sapiens        | HITS-CLIP               | Functional MTI (Weak)        | 23824327        |
| 11122         | Homo sapiens        | HITS-CLIP               | Functional MTI (Weak)        | 23824327        |
| 10890         | Homo sapiens        | PAR-CLIP                | Functional MTI (Weak)        | 20371350        |
| <b>10890</b>  | <b>Homo sapiens</b> | <b>PAR-CLIP</b>         | <b>Functional MTI (Weak)</b> | <b>21572407</b> |
| 84440         | Homo sapiens        | HITS-CLIP               | Functional MTI (Weak)        | 23824327        |
| 51552         | Homo sapiens        | HITS-CLIP               | Functional MTI (Weak)        | 23824327        |
| 57403         | Homo sapiens        | Immunofluorescer        | Functional MTI               | 22523078        |
| <b>57403</b>  | <b>Homo sapiens</b> | <b>Luciferase repor</b> | <b>Functional MTI</b>        | <b>24039954</b> |
| 5869          | Homo sapiens        | HITS-CLIP               | Functional MTI (Weak)        | 23824327        |
| 29127         | Homo sapiens        | PAR-CLIP                | Functional MTI (Weak)        | 20371350        |
| <b>29127</b>  | <b>Homo sapiens</b> | <b>PAR-CLIP</b>         | <b>Functional MTI (Weak)</b> | <b>21572407</b> |
| <b>29127</b>  | <b>Homo sapiens</b> | <b>PAR-CLIP</b>         | <b>Functional MTI (Weak)</b> | <b>23446348</b> |
| <b>29127</b>  | <b>Homo sapiens</b> | <b>PAR-CLIP</b>         | <b>Functional MTI (Weak)</b> | <b>23592263</b> |
| 54439         | Homo sapiens        | HITS-CLIP               | Functional MTI (Weak)        | 23824327        |
| 84060         | Homo sapiens        | HITS-CLIP               | Functional MTI (Weak)        | 19536157        |
| 79845         | Homo sapiens        | HITS-CLIP               | Functional MTI (Weak)        | 23824327        |
| 55178         | Homo sapiens        | HITS-CLIP               | Functional MTI (Weak)        | 23824327        |
| 6096          | Homo sapiens        | HITS-CLIP               | Functional MTI (Weak)        | 23824327        |
| 10799         | Homo sapiens        | HITS-CLIP               | Functional MTI (Weak)        | 23824327        |
| 6241          | Homo sapiens        | qRT-PCR                 | Functional MTI (Weak)        | 24940696        |
| 90378         | Homo sapiens        | HITS-CLIP               | Functional MTI (Weak)        | 23824327        |
| 389432        | Homo sapiens        | HITS-CLIP               | Functional MTI (Weak)        | 23824327        |
| 25956         | Homo sapiens        | HITS-CLIP               | Functional MTI (Weak)        | 19536157        |
| 57715         | Homo sapiens        | HITS-CLIP               | Functional MTI (Weak)        | 23824327        |
| 10955         | Homo sapiens        | Luciferase repor        | Functional MTI               | 24039954        |

|        |              |                  |                       |          |
|--------|--------------|------------------|-----------------------|----------|
| 462    | Homo sapiens | HITS-CLIP        | Functional MTI (Weak) | 23824327 |
| 5345   | Homo sapiens | HITS-CLIP        | Functional MTI (Weak) | 23824327 |
| 23544  | Homo sapiens | PAR-CLIP         | Functional MTI (Weak) | 22012620 |
| 23544  | Homo sapiens | PAR-CLIP         | Functional MTI (Weak) | 23446348 |
| 375035 | Homo sapiens | HITS-CLIP        | Functional MTI (Weak) | 23824327 |
| 8879   | Homo sapiens | PAR-CLIP         | Functional MTI (Weak) | 23592263 |
| 10019  | Homo sapiens | HITS-CLIP        | Functional MTI (Weak) | 23824327 |
| 63898  | Homo sapiens | HITS-CLIP        | Functional MTI (Weak) | 23824327 |
| 80851  | Homo sapiens | HITS-CLIP        | Functional MTI (Weak) | 23824327 |
| 9644   | Homo sapiens | HITS-CLIP        | Functional MTI (Weak) | 23824327 |
| 6474   | Homo sapiens | HITS-CLIP        | Functional MTI (Weak) | 23824327 |
| 9121   | Homo sapiens | HITS-CLIP        | Functional MTI (Weak) | 23824327 |
| 6505   | Homo sapiens | HITS-CLIP        | Functional MTI (Weak) | 23824327 |
| 9356   | Homo sapiens | HITS-CLIP        | Functional MTI (Weak) | 23824327 |
| 11001  | Homo sapiens | HITS-CLIP        | Functional MTI (Weak) | 23824327 |
| 55238  | Homo sapiens | HITS-CLIP        | Functional MTI (Weak) | 23824327 |
| 201266 | Homo sapiens | HITS-CLIP        | Functional MTI (Weak) | 23824327 |
| 55334  | Homo sapiens | HITS-CLIP        | Functional MTI (Weak) | 23824327 |
| 8501   | Homo sapiens | HITS-CLIP        | Functional MTI (Weak) | 19536157 |
| 124935 | Homo sapiens | HITS-CLIP        | Functional MTI (Weak) | 23824327 |
| 4091   | Homo sapiens | HITS-CLIP        | Functional MTI (Weak) | 23824327 |
| 64093  | Homo sapiens | HITS-CLIP        | Functional MTI (Weak) | 23824327 |
| 6591   | Homo sapiens | HITS-CLIP        | Functional MTI (Weak) | 23824327 |
| 51429  | Homo sapiens | HITS-CLIP        | Functional MTI (Weak) | 23824327 |
| 6648   | Homo sapiens | PAR-CLIP         | Functional MTI (Weak) | 23446348 |
| 6648   | Homo sapiens | PAR-CLIP         | Functional MTI (Weak) | 23592263 |
| 57537  | Homo sapiens | PAR-CLIP         | Functional MTI (Weak) | 20371350 |
| 57537  | Homo sapiens | PAR-CLIP         | Functional MTI (Weak) | 23592263 |
| 6655   | Homo sapiens | HITS-CLIP        | Functional MTI (Weak) | 23824327 |
| 65124  | Homo sapiens | HITS-CLIP        | Functional MTI (Weak) | 23824327 |
| 6667   | Homo sapiens | HITS-CLIP        | Functional MTI (Weak) | 23824327 |
| 6689   | Homo sapiens | HITS-CLIP        | Functional MTI (Weak) | 23824327 |
| 83985  | Homo sapiens | HITS-CLIP        | Functional MTI (Weak) | 23824327 |
| 8405   | Homo sapiens | HITS-CLIP        | Functional MTI (Weak) | 23824327 |
| 10847  | Homo sapiens | HITS-CLIP        | Functional MTI (Weak) | 23824327 |
| 57522  | Homo sapiens | HITS-CLIP        | Functional MTI (Weak) | 23824327 |
| 6749   | Homo sapiens | Luciferase repor | Functional MTI        | 24039954 |
| 8614   | Homo sapiens | HITS-CLIP        | Functional MTI (Weak) | 23824327 |
| 79689  | Homo sapiens | HITS-CLIP        | Functional MTI (Weak) | 23824327 |
| 55342  | Homo sapiens | HITS-CLIP        | Functional MTI (Weak) | 23824327 |
| 94056  | Homo sapiens | HITS-CLIP        | Functional MTI (Weak) | 23824327 |
| 9145   | Homo sapiens | HITS-CLIP        | Functional MTI (Weak) | 23824327 |
| 55333  | Homo sapiens | HITS-CLIP        | Functional MTI (Weak) | 23824327 |
| 148281 | Homo sapiens | HITS-CLIP        | Functional MTI (Weak) | 23824327 |
| 387332 | Homo sapiens | PAR-CLIP         | Functional MTI (Weak) | 22012620 |
| 6938   | Homo sapiens | Immunofluorescer | Functional MTI        | 22523078 |
| 6934   | Homo sapiens | HITS-CLIP        | Functional MTI (Weak) | 23824327 |
| 9895   | Homo sapiens | HITS-CLIP        | Functional MTI (Weak) | 23824327 |
| 7040   | Homo sapiens | Luciferase repor | Functional MTI        | 23726841 |
| 7048   | Homo sapiens | Luciferase repor | Functional MTI        | 24039954 |

|        |              |                     |                       |          |
|--------|--------------|---------------------|-----------------------|----------|
| 9220   | Homo sapiens | HITS-CLIP           | Functional MTI (Weak) | 23824327 |
| 11011  | Homo sapiens | PAR-CLIP            | Functional MTI (Weak) | 22291592 |
| 79853  | Homo sapiens | HITS-CLIP           | Functional MTI (Weak) | 23824327 |
| 23671  | Homo sapiens | PAR-CLIP            | Functional MTI (Weak) | 22291592 |
| 80008  | Homo sapiens | HITS-CLIP           | Functional MTI (Weak) | 23824327 |
| 653567 | Homo sapiens | HITS-CLIP           | Functional MTI (Weak) | 23824327 |
| 160335 | Homo sapiens | HITS-CLIP           | Functional MTI (Weak) | 23824327 |
| 26092  | Homo sapiens | HITS-CLIP           | Functional MTI (Weak) | 23824327 |
| 11076  | Homo sapiens | PAR-CLIP            | Functional MTI (Weak) | 20371350 |
| 11076  | Homo sapiens | PAR-CLIP//HITS-CLIP | Functional MTI (Weak) | 21572407 |
| 11076  | Homo sapiens | PAR-CLIP            | Functional MTI (Weak) | 23446348 |
| 11076  | Homo sapiens | HITS-CLIP           | Functional MTI (Weak) | 23824327 |
| 9819   | Homo sapiens | PAR-CLIP            | Functional MTI (Weak) | 22100165 |
| 55020  | Homo sapiens | HITS-CLIP           | Functional MTI (Weak) | 23824327 |
| 158219 | Homo sapiens | HITS-CLIP           | Functional MTI (Weak) | 23824327 |
| 10628  | Homo sapiens | PAR-CLIP            | Functional MTI (Weak) | 22012620 |
| 51465  | Homo sapiens | HITS-CLIP           | Functional MTI (Weak) | 23824327 |
| 7353   | Homo sapiens | HITS-CLIP           | Functional MTI (Weak) | 23824327 |
| 54490  | Homo sapiens | HITS-CLIP           | Functional MTI (Weak) | 23824327 |
| 201294 | Homo sapiens | HITS-CLIP           | Functional MTI (Weak) | 23824327 |
| 22846  | Homo sapiens | HITS-CLIP           | Functional MTI (Weak) | 23824327 |
| 7408   | Homo sapiens | HITS-CLIP           | Functional MTI (Weak) | 23824327 |
| 10451  | Homo sapiens | PAR-CLIP            | Functional MTI (Weak) | 20371350 |
| 10451  | Homo sapiens | HITS-CLIP           | Functional MTI (Weak) | 21572407 |
| 10451  | Homo sapiens | HITS-CLIP           | Functional MTI (Weak) | 23706177 |
| 10451  | Homo sapiens | HITS-CLIP           | Functional MTI (Weak) | 24906430 |
| 57191  | Homo sapiens | HITS-CLIP           | Functional MTI (Weak) | 23824327 |
| 10885  | Homo sapiens | HITS-CLIP           | Functional MTI (Weak) | 23824327 |
| 8840   | Homo sapiens | HITS-CLIP           | Functional MTI (Weak) | 23824327 |
| 80014  | Homo sapiens | HITS-CLIP           | Functional MTI (Weak) | 23824327 |
| 55841  | Homo sapiens | HITS-CLIP           | Functional MTI (Weak) | 23824327 |
| 114786 | Homo sapiens | PAR-CLIP            | Functional MTI (Weak) | 20371350 |
| 143570 | Homo sapiens | HITS-CLIP           | Functional MTI (Weak) | 23824327 |
| 26137  | Homo sapiens | HITS-CLIP           | Functional MTI (Weak) | 23824327 |
| 9278   | Homo sapiens | HITS-CLIP           | Functional MTI (Weak) | 23824327 |
| 23099  | Homo sapiens | HITS-CLIP           | Functional MTI (Weak) | 19536157 |
| 728116 | Homo sapiens | HITS-CLIP           | Functional MTI (Weak) | 19536157 |
| 219654 | Homo sapiens | HITS-CLIP           | Functional MTI (Weak) | 19536157 |
| 253832 | Homo sapiens | PAR-CLIP            | Functional MTI (Weak) | 20371350 |
| 253832 | Homo sapiens | PAR-CLIP            | Functional MTI (Weak) | 21572407 |
| 253832 | Homo sapiens | PAR-CLIP            | Functional MTI (Weak) | 23446348 |
| 253832 | Homo sapiens | PAR-CLIP            | Functional MTI (Weak) | 23592263 |
| 253832 | Homo sapiens | PAR-CLIP            | Functional MTI (Weak) | 24398324 |
| 463    | Homo sapiens | PAR-CLIP            | Functional MTI (Weak) | 22012620 |
| 387032 | Homo sapiens | HITS-CLIP           | Functional MTI (Weak) | 23824327 |
| 7570   | Homo sapiens | HITS-CLIP           | Functional MTI (Weak) | 23824327 |
| 149076 | Homo sapiens | HITS-CLIP           | Functional MTI (Weak) | 23824327 |
| 79750  | Homo sapiens | HITS-CLIP           | Functional MTI (Weak) | 19536157 |
| 57541  | Homo sapiens | HITS-CLIP           | Functional MTI (Weak) | 23824327 |
| 197407 | Homo sapiens | HITS-CLIP           | Functional MTI (Weak) | 23824327 |

|        |              |           |                       |          |
|--------|--------------|-----------|-----------------------|----------|
| 79177  | Homo sapiens | PAR-CLIP  | Functional MTI (Weak) | 22291592 |
| 9831   | Homo sapiens | HITS-CLIP | Functional MTI (Weak) | 23824327 |
| 115509 | Homo sapiens | HITS-CLIP | Functional MTI (Weak) | 23824327 |
| 440077 | Homo sapiens | HITS-CLIP | Functional MTI (Weak) | 23824327 |
| 65988  | Homo sapiens | HITS-CLIP | Functional MTI (Weak) | 23824327 |
| 342945 | Homo sapiens | HITS-CLIP | Functional MTI (Weak) | 23824327 |
| 55055  | Homo sapiens | HITS-CLIP | Functional MTI (Weak) | 23824327 |
| 79699  | Homo sapiens | PAR-CLIP  | Functional MTI (Weak) | 22012620 |

ated target number is 321.



is (PMID)
